# Supplementary material for: Patient preferences for atopic dermatitis medications in the UK, France and Spain: a discrete choice experiment
Source: HighWire-hosted journal article supplement (doi:10.1136/bmjopen-2021-058799), 2022-08-01
Supplement: bmjopen-2021-058799supp002_data_supplement.pdf [file bmjopen-2021-058799supp002_data_supplement.pdf]

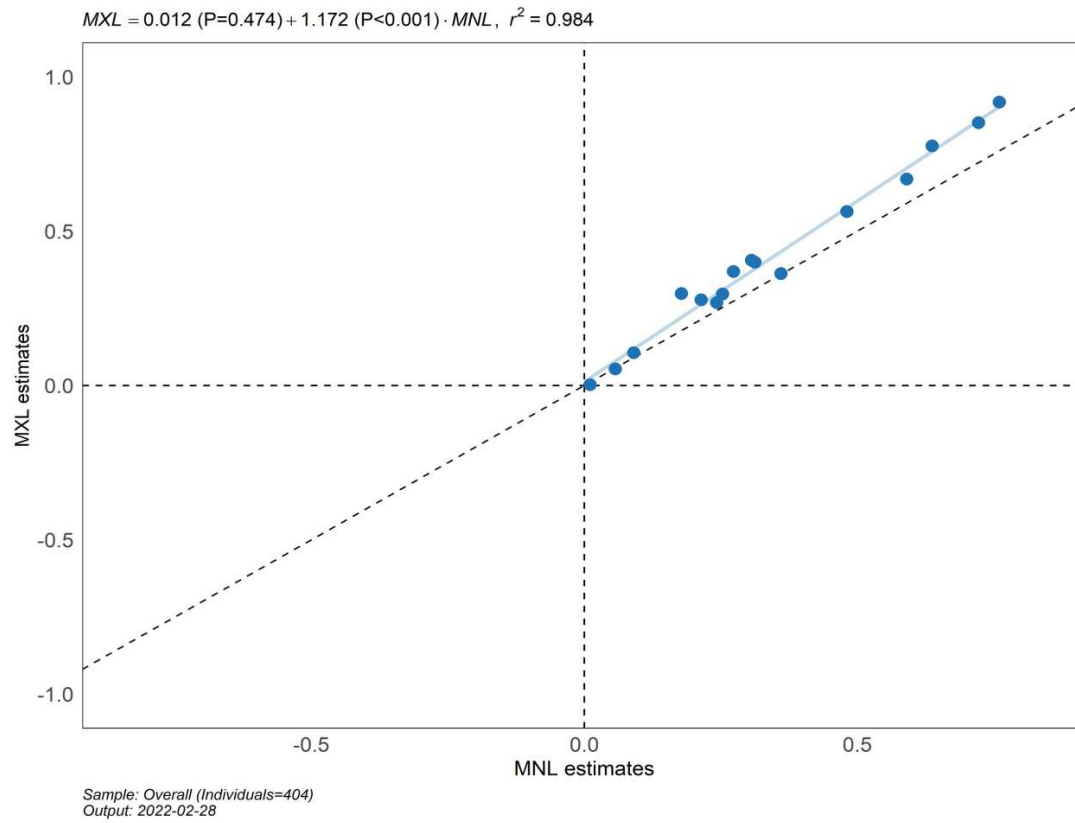**Supplemental Figure 1. Comparison of estimates between MXL and MNL models**

Abbreviation: MNL, multinomial logit; MXL, mixed logit
