# Supplementary material for: Patient preferences for atopic dermatitis medications in the UK, France and Spain: a discrete choice experiment
Source: HighWire-hosted journal article supplement (doi:10.1136/bmjopen-2021-058799), 2022-08-01
Supplement: bmjopen-2021-058799supp004_data_supplement.pdf [file bmjopen-2021-058799supp004_data_supplement.pdf]

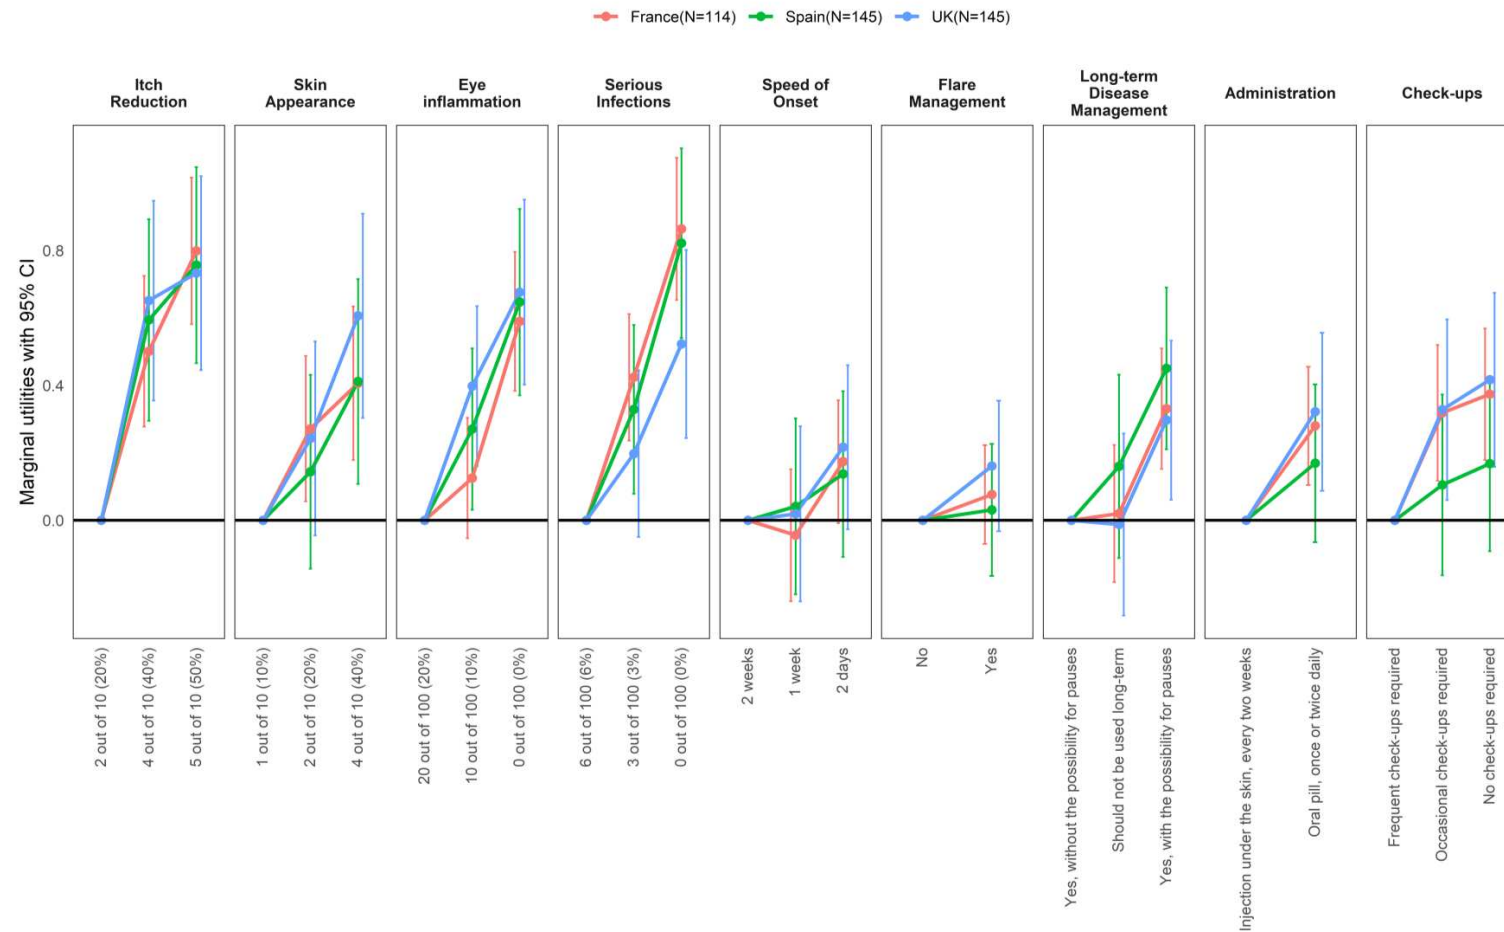

**Supplemental Figure 3. MNL results by country**

Abbreviation: CI, confidence interval
