# Supplementary material for: Patient preferences for atopic dermatitis medications in the UK, France and Spain: a discrete choice experiment
Source: HighWire-hosted journal article supplement (doi:10.1136/bmjopen-2021-058799), 2022-08-01
Supplement: bmjopen-2021-058799supp008_data_supplement.pdf [file bmjopen-2021-058799supp008_data_supplement.pdf]

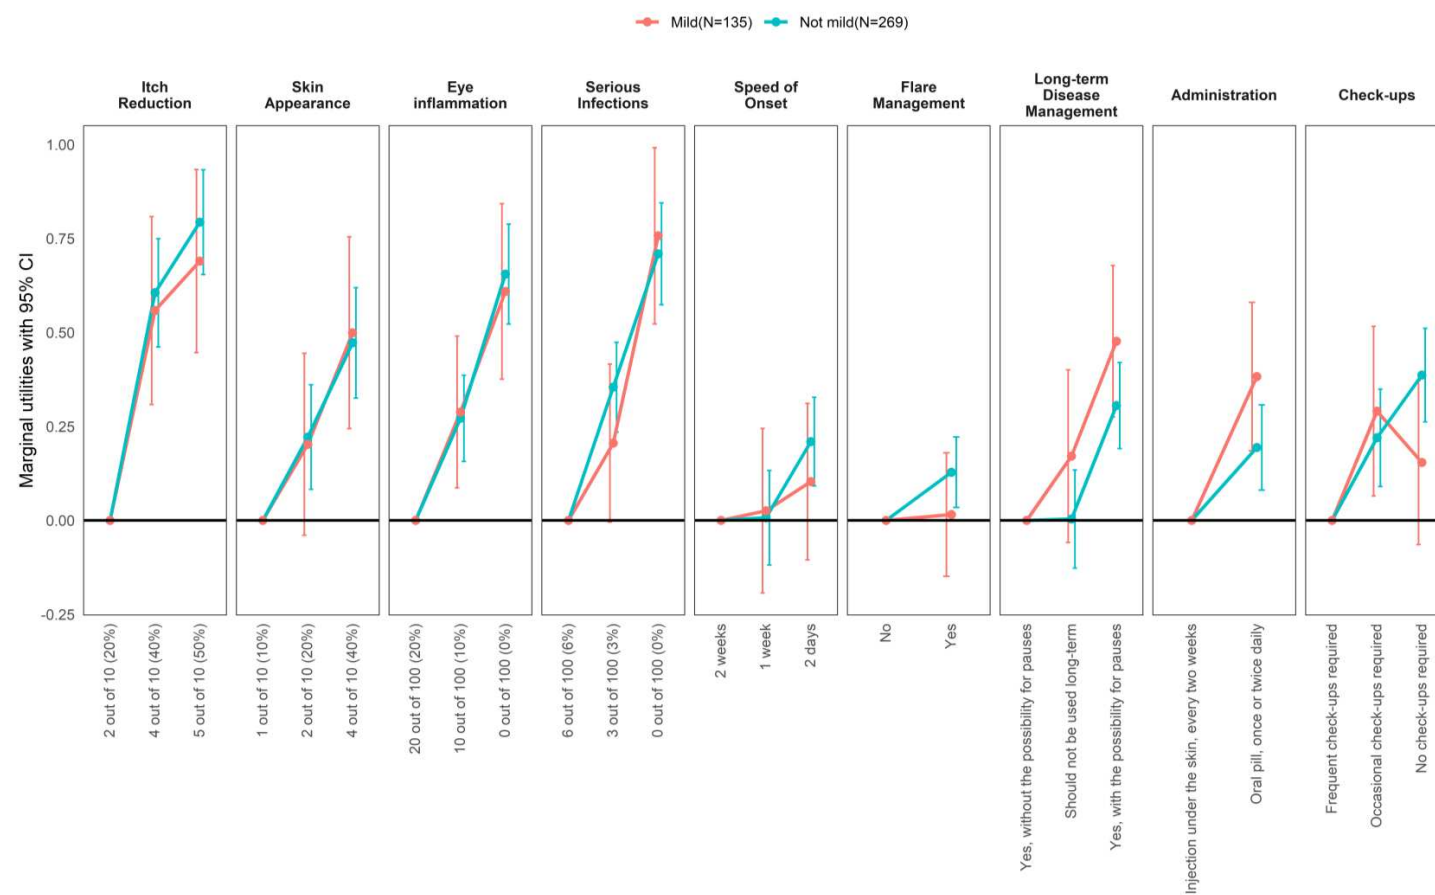

**Supplemental Figure 7. MNL results by self-reported eczema severity. Mild: very mild/mild; Not mild: moderate/severe/very severe.**

Abbreviation: CI, confidence interval
